# Supplementary material for: A Recombinant Chimeric Cedar Virus-Based Surrogate Neutralization Assay Platform for Pathogenic Henipaviruses
Source: MDPI journal article supplement (doi:10.3390/v15051077), 2023-04-28
Supplement: s1 [file s1]

**Table S1.** Mutations identified by genome sequencing of recombinant Cedar virus chimeras.

| Virus           | Total # of changes | Non coding mutations |            |                         |                        | Coding mutations |         |                          |                        |
|-----------------|--------------------|----------------------|------------|-------------------------|------------------------|------------------|---------|--------------------------|------------------------|
|                 |                    | Location             |            | base pair (bp) change   | amino acid (aa) change | Location (aa)    | Protein | base pair (bp) change    | amino acid (aa) change |
| rCedV-NiV-B     | 4                  |                      |            |                         |                        | 445              | N       | <u>A</u> GC- <u>G</u> GC | Ser-Gly                |
|                 |                    |                      |            |                         |                        | 296              | M       | <u>A</u> GG- <u>G</u> GG | Arg-Gly                |
|                 |                    |                      |            |                         |                        | 885              | L       | <u>C</u> AA- <u>C</u> GA | Gln-Arg                |
|                 |                    |                      |            |                         |                        | 2379             | L       | <u>T</u> TT- <u>T</u> CT | Phe-Ser                |
| rCedV-NiV-B-GFP | 8                  | bp 7                 | 3' Le      | C-A                     | N/A                    | 442              | N       | <u>A</u> TA- <u>A</u> CA | Ile-Thr                |
|                 |                    | aa 507               | N protein  | <u>GAT</u> - <u>GAC</u> | Asp-Asp                | 505              | N       | <u>T</u> TC- <u>C</u> TC | Phe-Leu                |
|                 |                    | bp 1866              | N stop IGR | T-C                     | N/A                    |                  |         |                          |                        |
|                 |                    | bp 1867              | N stop IGR | T-C                     | N/A                    |                  |         |                          |                        |
|                 |                    | bp 1915              | N stop IGR | T-C                     | N/A                    |                  |         |                          |                        |
|                 |                    | aa 1528              | L protein  | <u>TCA</u> - <u>TCG</u> | Ser-Ser                |                  |         |                          |                        |
| rCedV-NiV-B-Luc | 9                  | bp 7                 | 3' Le      | C-A                     | N/A                    | 441              | N       | <u>T</u> CA- <u>C</u> CA | Ser-Pro                |
|                 |                    | bp 1737              | N stop IGR | T-C                     | N/A                    | 231              | Luc     | <u>C</u> AG- <u>C</u> CG | Gln-Pro                |
|                 |                    | bp 1742              | N stop IGR | T-C                     | N/A                    | 25               | M       | <u>G</u> AA- <u>A</u> AA | Glu-Lys                |
|                 |                    | bp 1783              | N stop IGR | T-C                     | N/A                    | 2109             | L       | <u>A</u> AA- <u>G</u> AA | Lys-Glu                |
|                 |                    | bp 1894              | N stop IGR | T-C                     | N/A                    |                  |         |                          |                        |
| rCedV-HeV       | 2                  | bp 1755              | N stop IGR | C-A                     | N/A                    | 546              | F       | <u>A</u> CA- <u>A</u> TA | Thr-Ile                |
| rCedV-HeV-GFP   | 3                  | bp 20                | 3' Le      | G-A                     | N/A                    | 445              | N       | <u>A</u> GC- <u>G</u> GC | Ser-Gly                |
|                 |                    |                      |            |                         |                        | 245              | M       | <u>A</u> TG- <u>C</u> TG | Met-Leu                |
| rCedV-HeV-Luc   | 5                  | bp 2                 | 3' Le      | C-T                     | N/A                    |                  |         |                          |                        |
|                 |                    | bp 3                 | 3' Le      | C-T                     | N/A                    |                  |         |                          |                        |
|                 |                    | bp 4                 | 3' Le      | A-T                     | N/A                    |                  |         |                          |                        |
|                 |                    | bp 7                 | 3' Le      | C-A                     | N/A                    |                  |         |                          |                        |
|                 |                    | bp 19767             | 5' Tr      | A-T                     | N/A                    |                  |         |                          |                        |

Abbreviations: rCedV-NiV-B, recombinant Cedar virus with the fusion and attachment glycoproteins replaced with those of Nipah virus Bangladesh; rCedV-HeV, recombinant Cedar virus with the fusion and attachment glycoproteins of Hendra virus; bp, base pair; aa, amino acid; 3' Le, 3' leader; N, nucleoprotein; GFP, green fluorescent protein; Luc, luciferase protein; M, matrix protein; F, fusion glycoprotein; L, polymerase protein; IGR, intergenic region; 5' Tr, 5' trailer; A, adenine; T, thymine; C, cytosine; G, guanine; Ser, serine; Gly, glycine; Arg, arginine; Gln, glutamine; Phe, phenylalanine; Ile, isoleucine; Thr, threonine; Leu, leucine; Pro, proline; Glu, glutamic acid; Lys, lysine; Met, methionine; Asp, aspartic acid; #, number; N/A, not applicable.
